# Supplementary material
Source: PubMed Central journal article supplement (PMC1553484)
Supplement: pcbi.0020108.st001.pdf [file pcbi.0020108.st001.pdf]

Table S1: The number of tumors as categorized by the most common first two mutations. Bold indicates tumors that do not have *LR* or *GI* as a first or second mutation.

| Most common first two mutations | Number of tumors |
|---------------------------------|------------------|
| LR IA                           | 421              |
| LR EA                           | 268              |
| SG LR                           | 65               |
| GI LR                           | 56               |
| LR GI                           | 56               |
| GI IA                           | 27               |
| IA LR                           | 22               |
| GI EA                           | 20               |
| LR SG                           | 16               |
| GI SA                           | 12               |
| LR SA                           | 11               |
| GI SG                           | 4                |
| SG GI                           | 3                |
| <b>EA IA</b>                    | <b>1</b>         |
| <b>IA EA</b>                    | <b>1</b>         |
| IA GI                           | 1                |
| SA LR                           | 1                |
| <b>SG EA</b>                    | <b>1</b>         |
