# Supplementary material
Source: PubMed Central journal article supplement (PMC1553484)
Supplement: pcbi.0020108.st002.pdf [file pcbi.0020108.st002.pdf]

Table S2: Mean, standard deviation, and sample size for data in Figure 2A

| Timeblock | Average position (std) |             |             |             |             |             | # of tumors |
|-----------|------------------------|-------------|-------------|-------------|-------------|-------------|-------------|
|           | LR                     | SG          | GI          | IA          | EA          | SA          |             |
| 0-2K      | 3.31 (0.38)            | 3.97 (0.46) | 2.90 (0.49) | 4.68 (0.59) | 4.23 (0.56) | 5.66 (0.67) | 86          |
| 2-5K      | 1.93 (0.24)            | 3.97 (0.46) | 4.99 (0.71) | 3.46 (0.44) | 4.09 (0.49) | 6.48 (0.78) | 60          |
| 5K-10K    | 1.54 (0.18)            | 5.06 (0.60) | 4.79 (0.71) | 3.12 (0.39) | 3.54 (0.42) | 6.22 (0.77) | 84          |
| 10K-15K   | 1.34 (0.17)            | 5.35 (0.64) | 4.97 (0.68) | 2.89 (0.36) | 3.58 (0.43) | 6.21 (0.75) | 148         |
| 15K-20K   | 1.17 (0.15)            | 5.48 (0.68) | 5.25 (0.72) | 2.64 (0.32) | 3.43 (0.41) | 6.30 (0.78) | 194         |
| 20K-25K   | 1.13 (0.15)            | 5.39 (0.69) | 5.52 (0.76) | 2.73 (0.35) | 3.24 (0.40) | 6.42 (0.82) | 147         |
| 25K-30K   | 1.11 (0.14)            | 5.28 (0.69) | 5.92 (0.85) | 2.97 (0.41) | 2.96 (0.41) | 6.40 (0.88) | 124         |
| 30K-35K   | 1.04 (0.15)            | 5.32 (0.76) | 6.21 (0.96) | 3.31 (0.48) | 2.20 (0.32) | 6.41 (0.97) | 70          |
| 35K-4K    | 1.01 (0.16)            | 5.47 (0.86) | 6.52 (1.06) | 3.16 (0.51) | 2.01 (0.31) | 6.49 (1.06) | 41          |
| 40K-45K   | 1.00 (0.15)            | 5.51 (0.86) | 6.16 (1.02) | 3.17 (0.49) | 2.00 (0.31) | 6.51 (1.05) | 21          |
| 45K-50K   | 1.02 (0.14)            | 5.49 (0.80) | 6.54 (0.93) | 3.36 (0.47) | 2.01 (0.28) | 6.59 (0.95) | 11          |
